# Supplementary material for: Curcumin Triggers S-Phase Accumulation and p53-Bax/Bcl-2-Mediated Intrinsic Apoptosis in HCT-116 Colorectal Cancer Cells
Source: Research Square preprint supplement (doi:10.21203/rs.3.rs-8432900/v1), 2026-02-02
Supplement: Supplementary file 1 [file dff516d9792f7e4485a2504b.docx]

**Supplementary Table 1** Raw and derived qPCR data for BAX, TP53, and BCL-2 expression in HCT-116 cells after 48 h of curcumin treatment

| **Gene** | **Condition** | **Replicate** | **Target Ct** | **GAPDH Ct** | **ΔCt (Target-GAPDH)** | **ΔΔCt** | **RQ (2⁻ΔΔCt)** |
| --- | --- | --- | --- | --- | --- | --- | --- |
| **BAX** | Control (0 µg/mL) | 1 | 24.600 | 16.80 | 7.80 | -0.267 | 1.203 |
| 2 | 25.100 | 16.90 | 8.20 | 0.133 | 0.911 |
| Mean | - | 16.85 | 8.00 | - | 1.010 |
| Curcumin (35 µg/mL) | 1 | 28.300 | 21.30 | 7.00 | -1.067 | 2.090 |
| 2 | 28.800 | 21.30 | 7.50 | -0.567 | 1.480 |
| Mean | - | 21.30 | 7.25 | - | 1.700 |
| **TP53** | Control (0 µg/mL) | 1 | 27.500 | 16.800 | 10.650 | 0.100 | 0.933 |
| 2 | 27.300 | 16.900 | 10.450 | -0.100 | 1.072 |
| Mean | - | 16.85 | 10.55 | - | 1.002 |
| Curcumin (35 µg/mL) | 1 | 30.300 | 21.300 | 9.000 | -1.550 | 2.928 |
| 2 | 30.500 | 21.300 | 9.200 | -1.350 | 2.549 |
| Mean | - | 21.30 | 9.10 | - | 2.739 |
| **BCL-2** | Control (0 µg/mL) | 1 | 25.200 | 16.800 | 8.400 | -0.100 | 1.071 |
| 2 | 25.500 | 16.900 | 8.600 | 0.100 | 0.933 |
| Mean | - | 16.85 | 8.50 | - | 1.002 |
| Curcumin (35 µg/mL) | 1 | 31.000 | 21.300 | 9.700 | 1.300 | 0.406 |
| 2 | 31.400 | 21.300 | 10.10 | 1.600 | 0.330 |
| Mean | - | 21.30 | 9.90 | - | 0.368 |

**Footnote.** Data are taken from the original qPCR runs for BAX, TP53, and BCL-2. ΔCt = Ct(Target) – Ct(GAPDH); ΔΔCt and RQ values (2⁻ΔΔCt) are as reported by the qPCR analysis software. (Mean) rows summarize the two technical replicates for each gene/condition and correspond to the RQ values used in the main-text Table 3 (BAX ≈ 1.70, TP53 ≈ 2.74, BCL-2 ≈ 0.37). (-) indicates not applicable.
